# Supplementary material for: Developing Cardio-Oncology Programs in the New Era: Beyond Ventricular Dysfunction Due to Cancer Treatments
Source: MDPI journal article supplement (doi:10.3390/cancers15245885), 2023-12-18
Supplement: s1 [file s1]

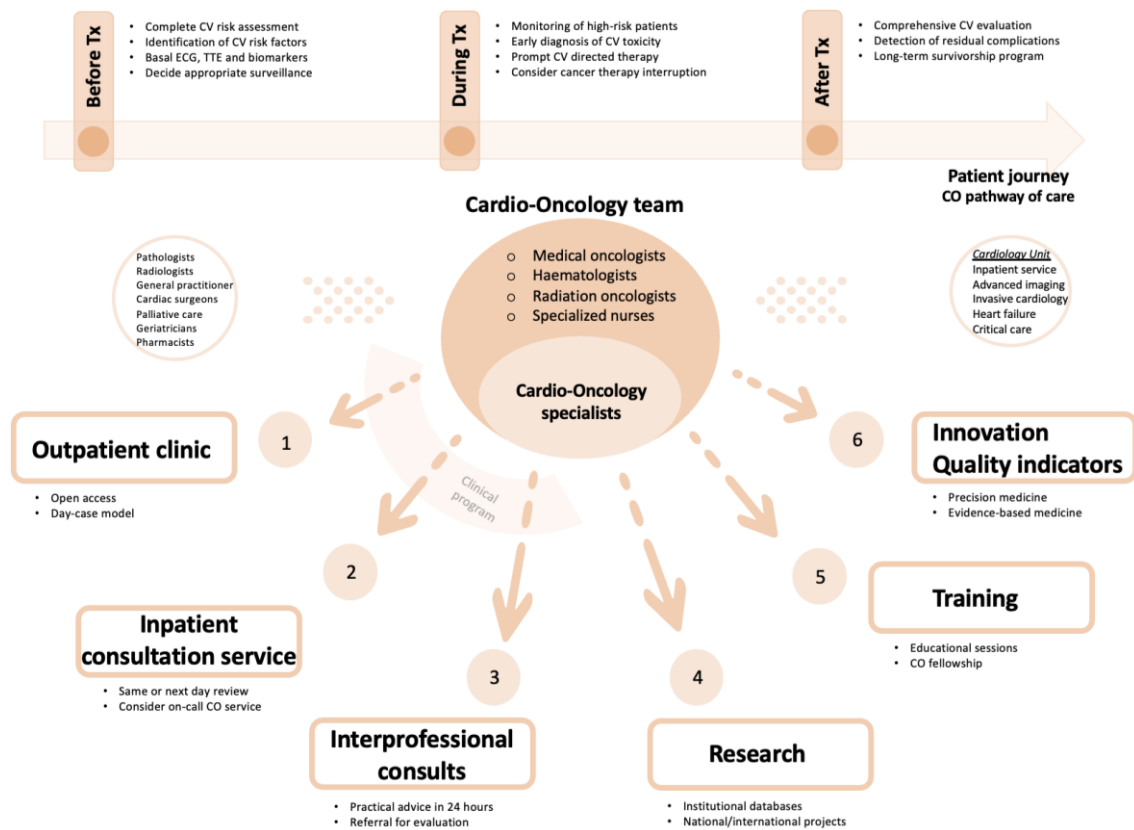

**Supplementary Figure S1:** Clinical care pathway and main components of a Cardio-Oncology program. Abbreviations: CO, Cardio-Oncology; CV, Cardiovascular; ECG, Electrocardiogram; TTE, Transthoracic echocardiography; Tx, Treatment.
